# Supplementary material
Source: PubMed Central journal article supplement (PMC5528451)

# Supplementary Figures

S. Fig 1

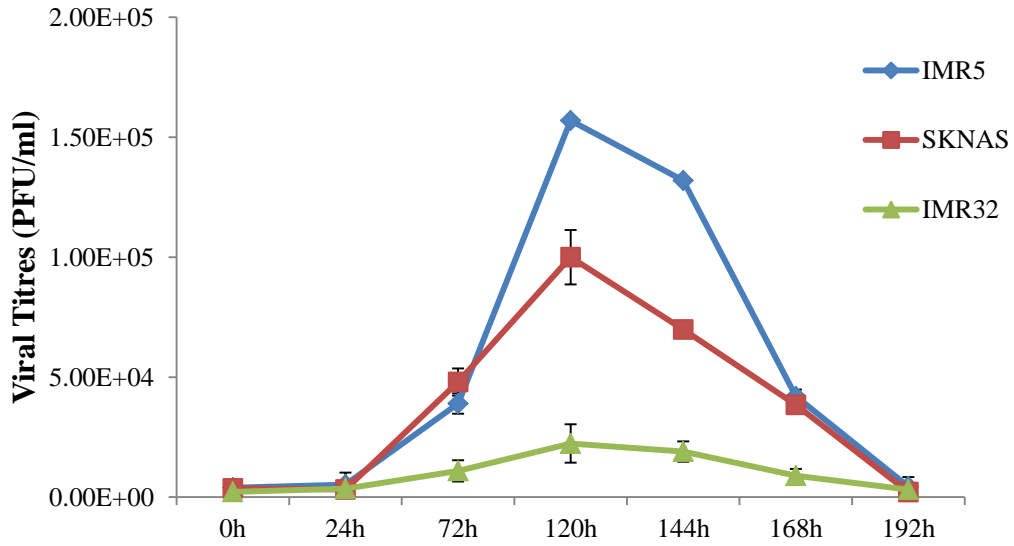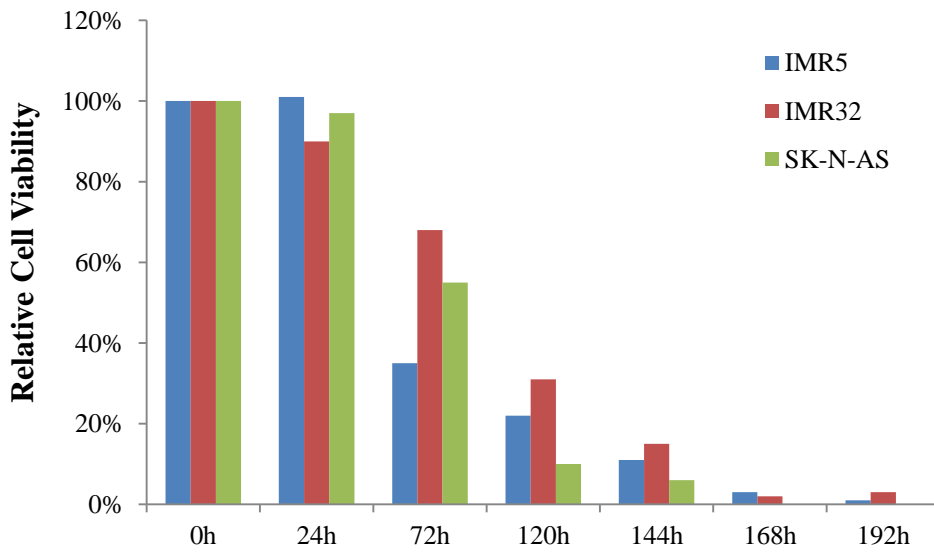

Supplement: MOL2-7-0944-s001.pdf [file MOL2-7-0944-s001.pdf]

S. Fig 2

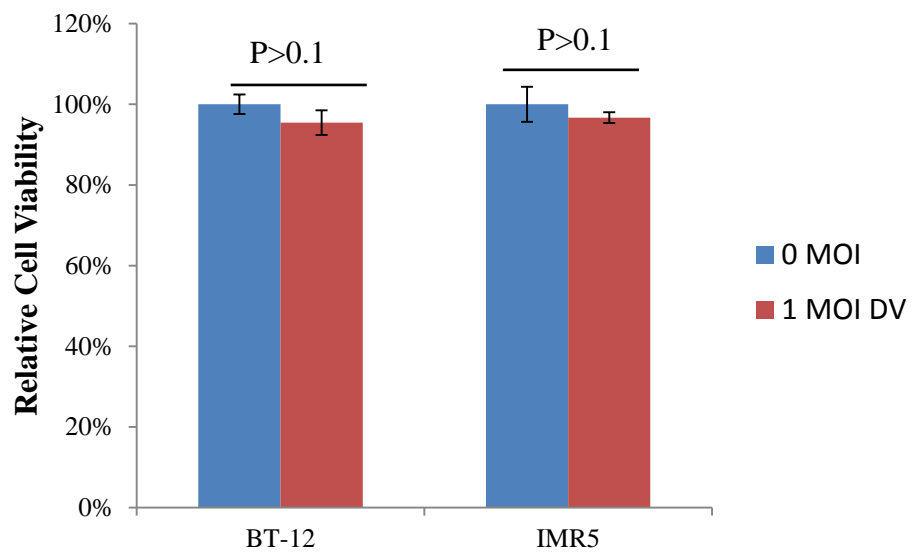

Supplement: MOL2-7-0944-s002.pdf [file MOL2-7-0944-s002.pdf]
